# Supplementary material for: Activation of FXR protects against renal fibrosis via suppressing Smad3 expression
Source: PubMed Central journal article supplement (PMC5112546; doi:10.1038/srep37234), 2016-11-17
Supplement: srep37234-s1.pdf [file srep37234-s1.pdf]

## **SUPPLEMENTARY INFORMATION**

### **Activation of FXR protects against renal fibrosis via suppressing Smad3 expression**

Kai Zhao<sup>a,b,†</sup>, Jialin He<sup>a,†</sup>, Yan Zhang<sup>a</sup>, Zhizhen Xu<sup>a</sup>, Haojun Xiong<sup>a</sup>, Rujun Gong<sup>c</sup>, Song Li<sup>d</sup>, Shan Chen<sup>a,\*</sup>, and Fengtian He<sup>a,\*</sup>

<sup>a</sup>Department of Biochemistry and Molecular Biology, College of Basic Medical Sciences, Third Military Medical University, Chongqing 400038, China. <sup>b</sup>Department of Pathogenic Biology, College of Basic Medical Sciences, Third Military Medical University, Chongqing 400038, China. <sup>c</sup>Division of Kidney Disease and Hypertension, Department of Medicine, Rhode Island Hospital, Brown University School of Medicine, Providence, RI 02903, USA. <sup>d</sup>Department of Pharmaceutical Sciences, School of Pharmacy, University of Pittsburgh, Pittsburgh, PA 15261, USA. Correspondence and requests for materials should be addressed to F.H. (email: [hefengtian06@aliyun.com](mailto:hefengtian06@aliyun.com)) or S.C. (email: [cs723cn@hotmail.com](mailto:cs723cn@hotmail.com))

Shan Chen: Tel: +862368752258, E-mail: [cs723cn@hotmail.com](mailto:cs723cn@hotmail.com)

Fengtian He: Tel./fax: +862368752255, E-mail: [hefengtian06@aliyun.com](mailto:hefengtian06@aliyun.com)

Department of Biochemistry and Molecular Biology, College of Basic Medical Sciences, Third Military Medical University, 30 Gaotanyan, Shapingba, Chongqing 400038, China.

**Supplementary Figure S1. The correlation of FXR and Smad2 in human fibrotic kidneys.** The expression of FXR and Smad2 in 15 human fibrotic kidneys and 15 normal control kidney tissues were examined by qRT-PCR, taking  $\beta$ -actin as a control. The correlation between the levels of FXR and Smad2 in human fibrotic kidneys were analyzed with Pearson's test (FXR/Smad4  $r = -0.4332$ ,  $P = 0.1067$ ).

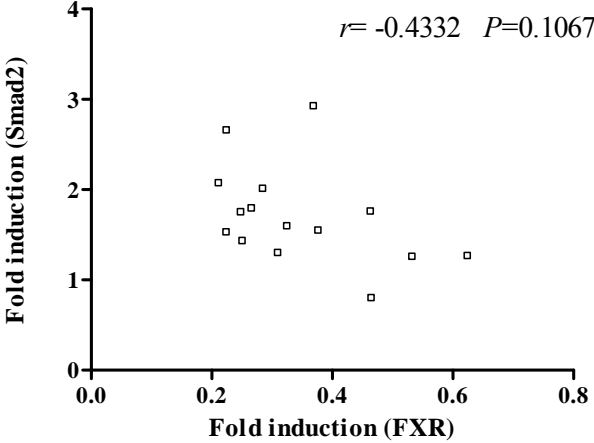

**Supplementary Table S1. Subject demographics**

|                    | Control group (n=15) | Fibrosis group (n=15) |
|--------------------|----------------------|-----------------------|
| Female             | 3                    | 6                     |
| Male               | 12                   | 9                     |
| Average age (year) | 59.6                 | 50.3                  |
| Age(min)           | 35                   | 24                    |
| Age(max)           | 72                   | 80                    |

**Supplementary Table S2. The primer sets for qRT-PCR**

| Gene            | Product size (bp) | Forward primers               | Reverse primers               |
|-----------------|-------------------|-------------------------------|-------------------------------|
| <i>hFN</i>      | 180               | 5'-tgtaccatcgcaaaccg-3'       | 5'-ggaagtcccagcagcat-3'       |
| <i>hFXR</i>     | 165               | 5'-tacatgcgaagaaagtgtcaaga-3' | 5'-actgtcttcattcacggtctgat-3' |
| <i>hSHP</i>     | 170               | 5'-cccaagatgctgtgacctt-3'     | 5'-ccagaaggactccagacagc-3'    |
| <i>hSmad2</i>   | 182               | 5'-cggcgggagaagca-3'          | 5'-ttaccaaaggcagcaa-3'        |
| <i>hSmad3</i>   | 120               | 5'-gagtgcctcagtgcagc-3'       | 5'-ggtagacagcctcaaagc-3'      |
| <i>hSmad4</i>   | 137               | 5'-gaacattggatgggagg-3'       | 5'-taagtcaaacgcatactga-3'     |
| <i>hβ-actin</i> | 157               | 5'-gtgaaggtgacagcagtcggtt-3'  | 5'-gaagtggggtggttttagga-3'    |
| <i>mFN</i>      | 151               | 5'-gaggcaggctcagcaaat -3'     | 5'-tccatagcaggtacaaacc -3'    |
| <i>mFXR</i>     | 148               | 5'-tgtgagggtgcaaagttt-3'      | 5'-acatccccatctctttgcac-3'    |
| <i>mSmad2</i>   | 107               | 5'-gaaagccatcaccactca-3'      | 5'-tgtcccactgatctaccg-3'      |
| <i>mSmad3</i>   | 193               | 5'-gagaagtggtgcgagaag-3'      | 5'-acaggcggcagtagataa-3'      |
| <i>mSmad4</i>   | 187               | 5'-agaacattggatggacgact-3'    | 5'-agacaaccgctcatagt-3'       |
| <i>mβ-actin</i> | 165               | 5'-tgttaccactgggacgaca-3'     | 5'-ggggtgtgaaggtctcaa-3'      |

Abbreviation: h, human; m, mouse.
